# Supplementary material for: Cinnamomum zeylanicum Blume (Ceylon cinnamon) bark extract attenuates doxorubicin induced cardiotoxicity in Wistar rats
Source: PubMed Central journal article supplement — Saudi Pharm J. 2021 Jun 20;29(8):820–32. doi: 10.1016/j.jsps.2021.06.004 (PMC8363100; doi:10.1016/j.jsps.2021.06.004), 2021-06-20
Supplement: mmc1.pdf [file mmc1.pdf]

Table 1: Physicochemical properties of ABEC

| Physicochemical properties          | <i>Cinnamomum zeylanicum</i> bark                                                                                                         |
|-------------------------------------|-------------------------------------------------------------------------------------------------------------------------------------------|
| Moisture content (%)                | 11.0                                                                                                                                      |
| Extractable matters in water (%)    |                                                                                                                                           |
| Hot                                 | 8.4                                                                                                                                       |
| Cold                                | 5.3                                                                                                                                       |
| Extractable matters in methanol (%) |                                                                                                                                           |
| Hot                                 | 5.3                                                                                                                                       |
| Cold                                | 3.3                                                                                                                                       |
| Heavy metals                        |                                                                                                                                           |
| Lead                                | Not detected                                                                                                                              |
| Cadmium                             | Not detected                                                                                                                              |
| Arsenic                             | Not detected                                                                                                                              |
| Mercury                             | Not detected                                                                                                                              |
| Microscopic analysis                | Cork cells, starch grains, thin and thick wall fibres, stone cells, resin containing cells needle shaped bark cell with crystals observed |

ABEC; Aqueous bark extract of *Cinnamomum zeylanicum*

Table 2: Phytochemical profile of ABEC

| Phytochemicals         | Positivity/ negativity |
|------------------------|------------------------|
| Saponins               | Positive               |
| Polyphenols            | Positive               |
| Alkaloids              | Positive               |
| Tannins                | Positive               |
| Flavonoids             | Negative               |
| Anthracene glycosides  | Negative               |
| Cyanogenic glycosides  | Negative               |
| Cardenoloid glycosides | Negative               |
| Reducing sugars        | Positive               |
| Proteins               | Positive               |

ABEC; Aqueous bark extract of *Cinnamomum zeylanicum*

Table 3: Total polyphenol content and in vitro antioxidant activity of ABEC

|                                                       | ABEC          | Standard (Ascorbic acid) |
|-------------------------------------------------------|---------------|--------------------------|
| Total polyphenol content (mg GAE/g dw)                | 11.60 ± 1.9   | NA                       |
| IC <sub>50</sub> value in DPPH assay (µg/mL)          | 95.08 ± 0.06  | 8.73 ± 0.21              |
| IC <sub>50</sub> value in NO inhibition assay (µg/mL) | 166.29 ± 0.08 | 31.25 ± 0.16             |
| FRAP value (µM)                                       | 23.49 ± 1.06  | NA                       |

ABEC; Aqueous bark extract of *Cinnamomum zeylanicum*, NA; Not applicable

Table 4: Average grading of cells with necrotic changes in animals exposed to different doses of ABEC

| Animal group | Subendocardial region of heart tissues<br>(score out of 4) | Peripheral region of heart tissues (score out of 4) | Total score<br>(out of 8) |
|--------------|------------------------------------------------------------|-----------------------------------------------------|---------------------------|
| Group 1      | 0                                                          | 0                                                   | 0                         |
| Group 2      | 4.0                                                        | 3.9                                                 | 7.9                       |
| Group 3      | 4.0                                                        | 3.8                                                 | 7.8                       |
| Group 4      | 3.8                                                        | 3.3                                                 | 7.1                       |
| Group 5      | 3.3                                                        | 3.0                                                 | 6.3                       |
| Group 6      | 2.0                                                        | 2.3                                                 | 4.3                       |
| Group 7      | 2.0                                                        | 1.8                                                 | 3.8                       |

Group 1; Control, Group 2; Doxorubicin control, Group 3; Dox + 0.125 g/kg of ABEC, Group 4; Dox + 0.25 g/kg of ABEC, Group 5; Dox + 0.50 g/kg of ABEC, Group 6; Dox + 1.0 g/kg of ABEC, Group 7; Dox + 2.0 g/kg of ABEC

Grading scale; no cells with necrotic changes: 0; up to 10 cells with necrotic changes: 1; 10-50 cells with necrotic changes: 2; 50-100 cells with necrotic changes: 3; >100 cells with necrotic changes: 4

ABEC; Aqueous bark extract of *Cinnamomum zeylanicum*, Dox; doxorubicin

Table 5: Dose response effect on reversible histological changes in myocardium of Wistar rats exposed to different doses of ABEC

| Animal group | Haemorrhages | Interstitial oedema | Inflammatory infiltrations | Intracellular Vacuoles | Congestion of blood vessels | Wavy myocardial fibers |
|--------------|--------------|---------------------|----------------------------|------------------------|-----------------------------|------------------------|
| Group 1      | Negative     | Negative            | Negative                   | Negative               | Negative                    | Negative               |
| Group 2      | Positive     | Positive            | Positive                   | Positive               | Positive                    | Positive               |
| Group 3      | Positive     | Positive            | Positive                   | Positive               | Positive                    | Positive               |
| Group 4      | Positive     | Positive            | Positive                   | Positive               | Positive                    | Positive               |
| Group 5      | Negative     | Positive            | Negative                   | Positive               | Positive                    | Positive               |
| Group 6      | Negative     | Negative            | Negative                   | Positive               | Positive                    | Positive               |
| Group 7      | Negative     | Negative            | Negative                   | Positive               | Positive                    | Negative               |

Group 1; Control, Group 2; Doxorubicin control, Group 3; Dox + 0.125 g/kg of ABEC, Group 4; Dox + 0.25 g/kg of ABEC, Group 5; Dox + 0.50 g/kg of ABEC, Group 6; Dox + 1.0 g/kg of ABEC, Group 7; Dox + 2.0 g/kg of ABEC  
 ABEC; Aqueous bark extract of *Cinnamomum zeylanicum*, Dox; doxorubicin

Table 6: Effect of optimum dose of ABEC on reversible histological changes in myocardial tissues of Wistar rats

| Reversible histopathological changes | Group I (Normal control) | Group II (Plant control) | Group III (Dox Control) | Group IV (Dox + ABEC) | Group V (Positive control) |
|--------------------------------------|--------------------------|--------------------------|-------------------------|-----------------------|----------------------------|
| Haemorrhages                         | Negative                 | Negative                 | Positive                | Negative              | Negative                   |
| Interstitial oedema                  | Negative                 | Negative                 | Positive                | Negative              | Negative                   |
| Inflammatory infiltrations           | Negative                 | Negative                 | Positive                | Negative              | Negative                   |
| Intracellular vacuoles               | Negative                 | Negative                 | Positive                | Positive              | Positive                   |
| Congestion of blood vessel           | Negative                 | Negative                 | Positive                | Positive              | Negative                   |
| Wavy myocardial fibers               | Negative                 | Negative                 | Positive                | Negative              | Negative                   |

Dox; Doxorubicin, ABEC; Aqueous bark extract of *Cinnamomum zeylanicum*

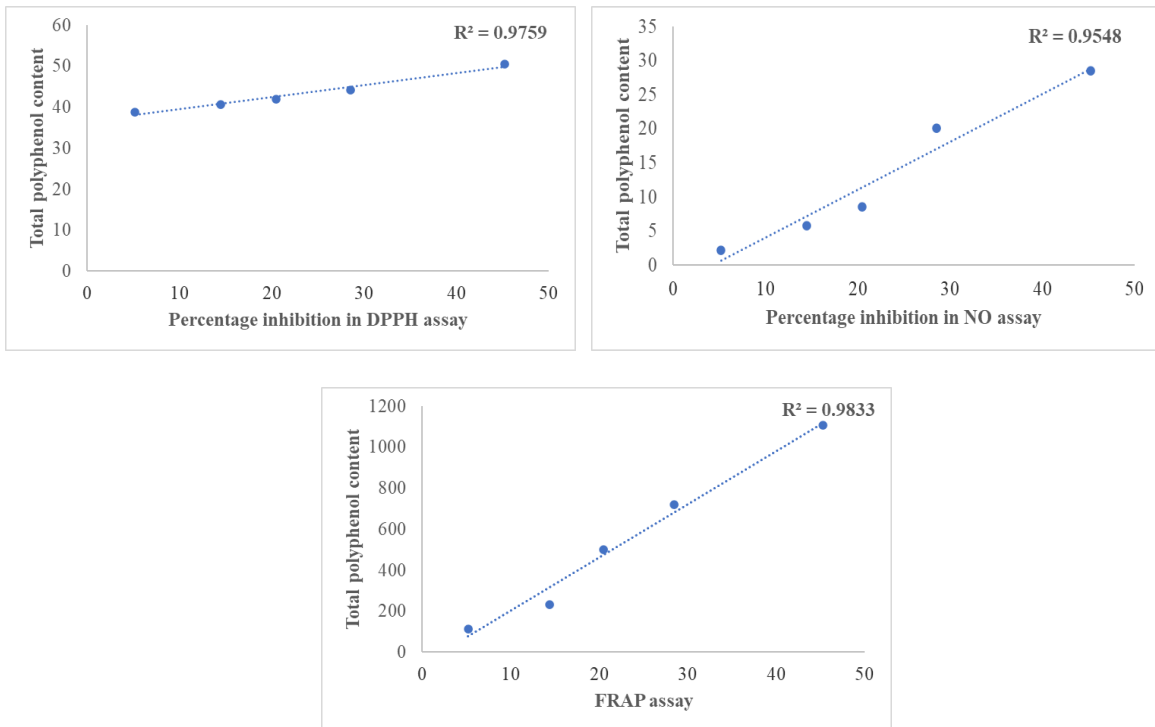

Figure 1: Linear regression analysis between total polyphenol content and the *in vitro* antioxidant assay results of ABEC
